# Supplementary material
Source: PubMed Central journal article supplement (PMC3770948)
Supplement: emboj2013170df2.pdf [file emboj2013170df2.pdf]

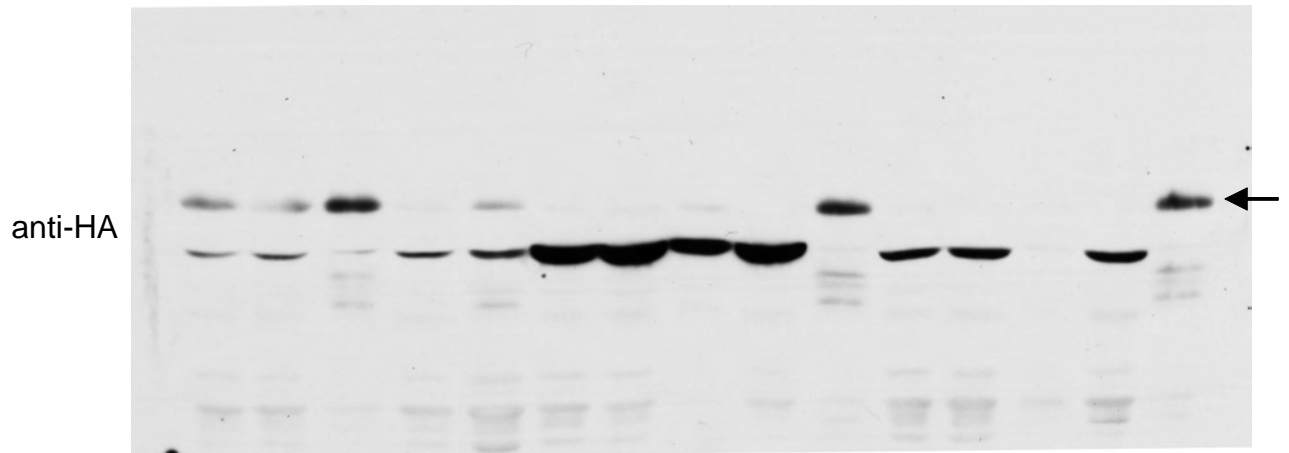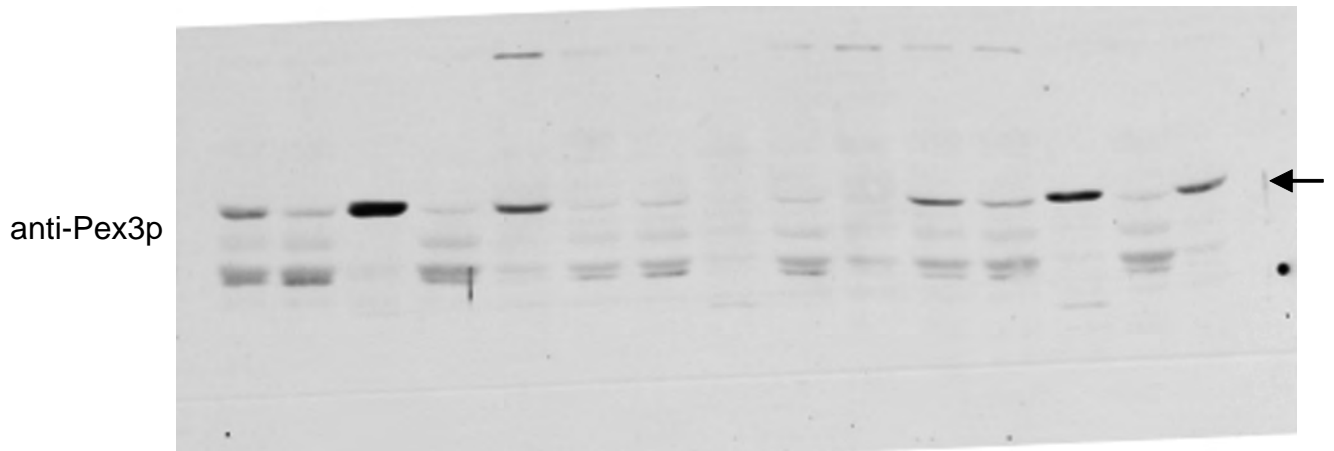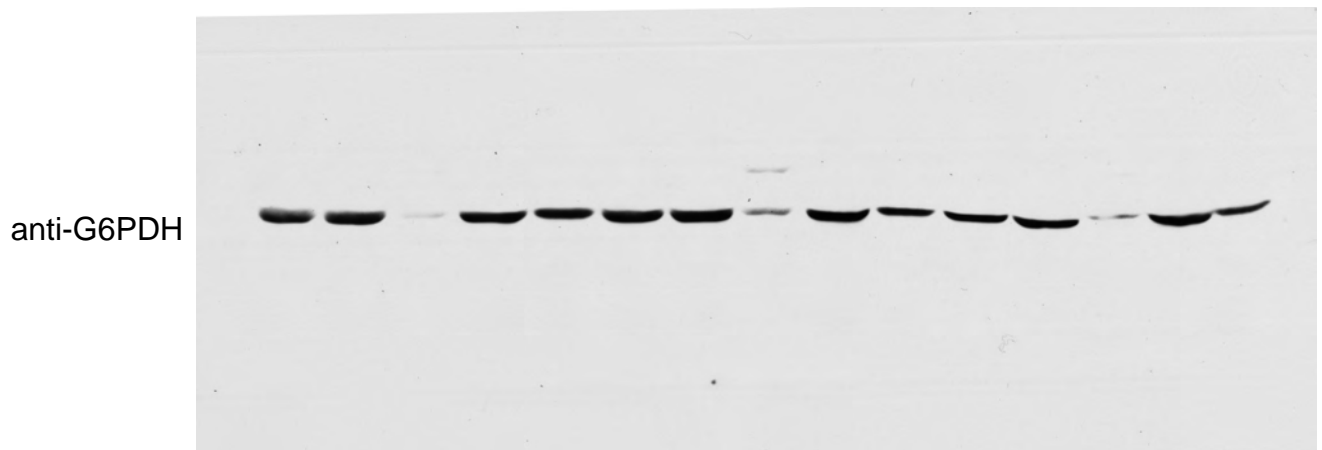

specific bands are denoted by arrow

wild-type samples

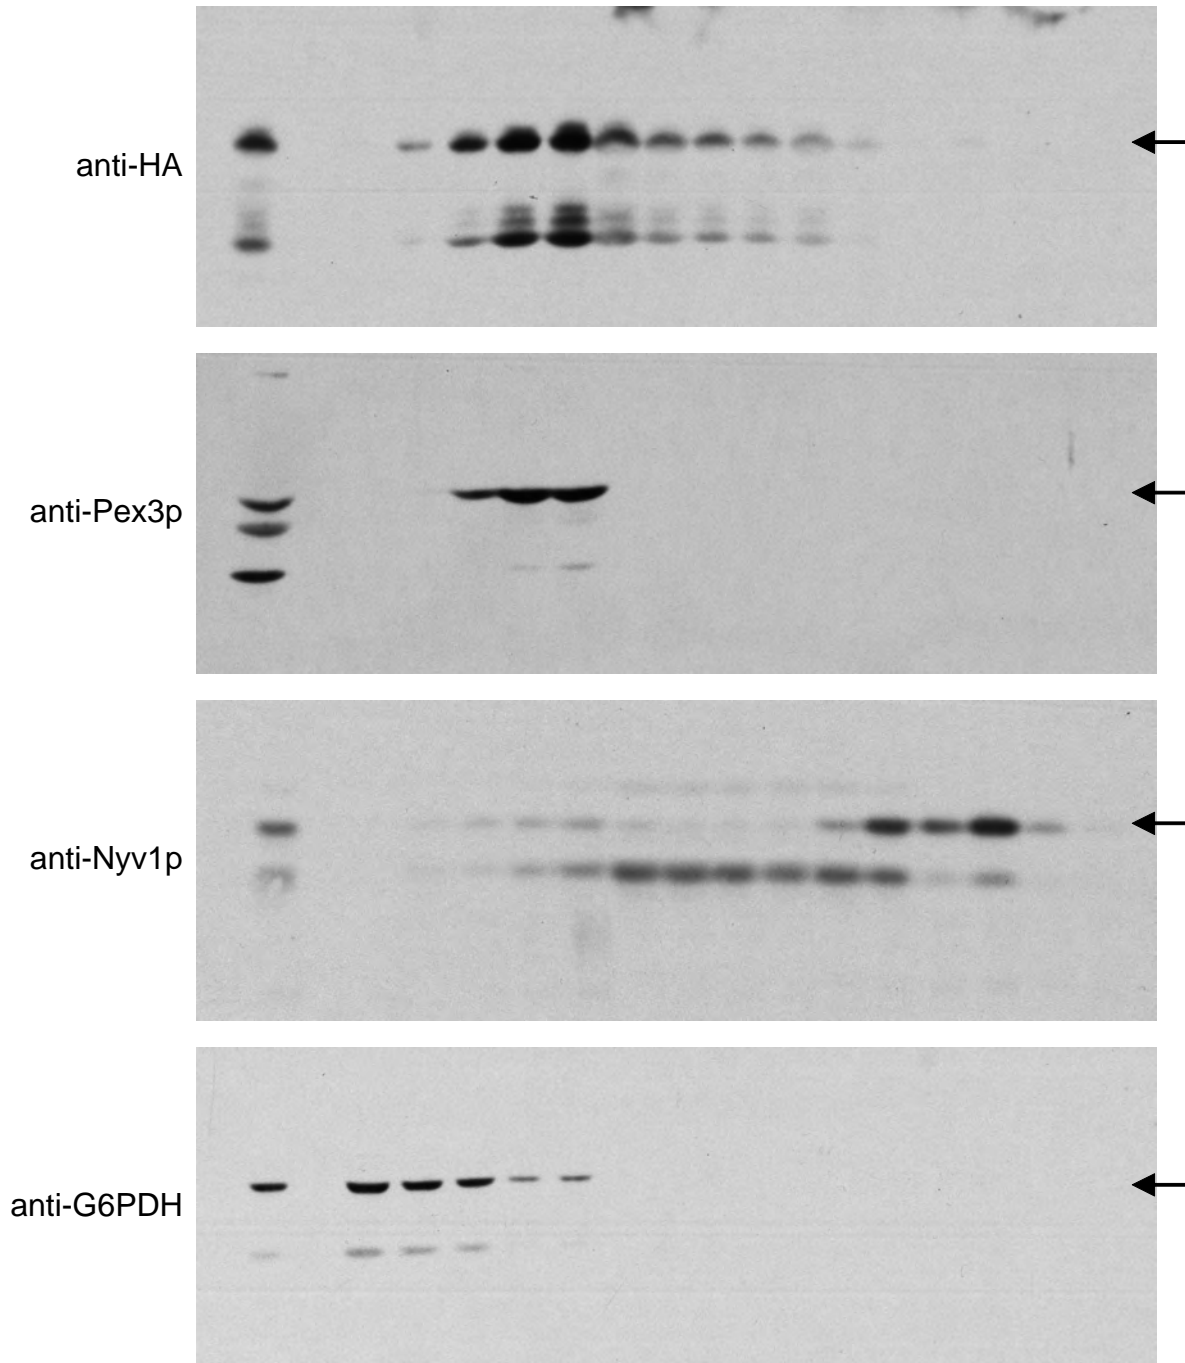

specific bands are denoted by arrow

*pex3Δ* samples

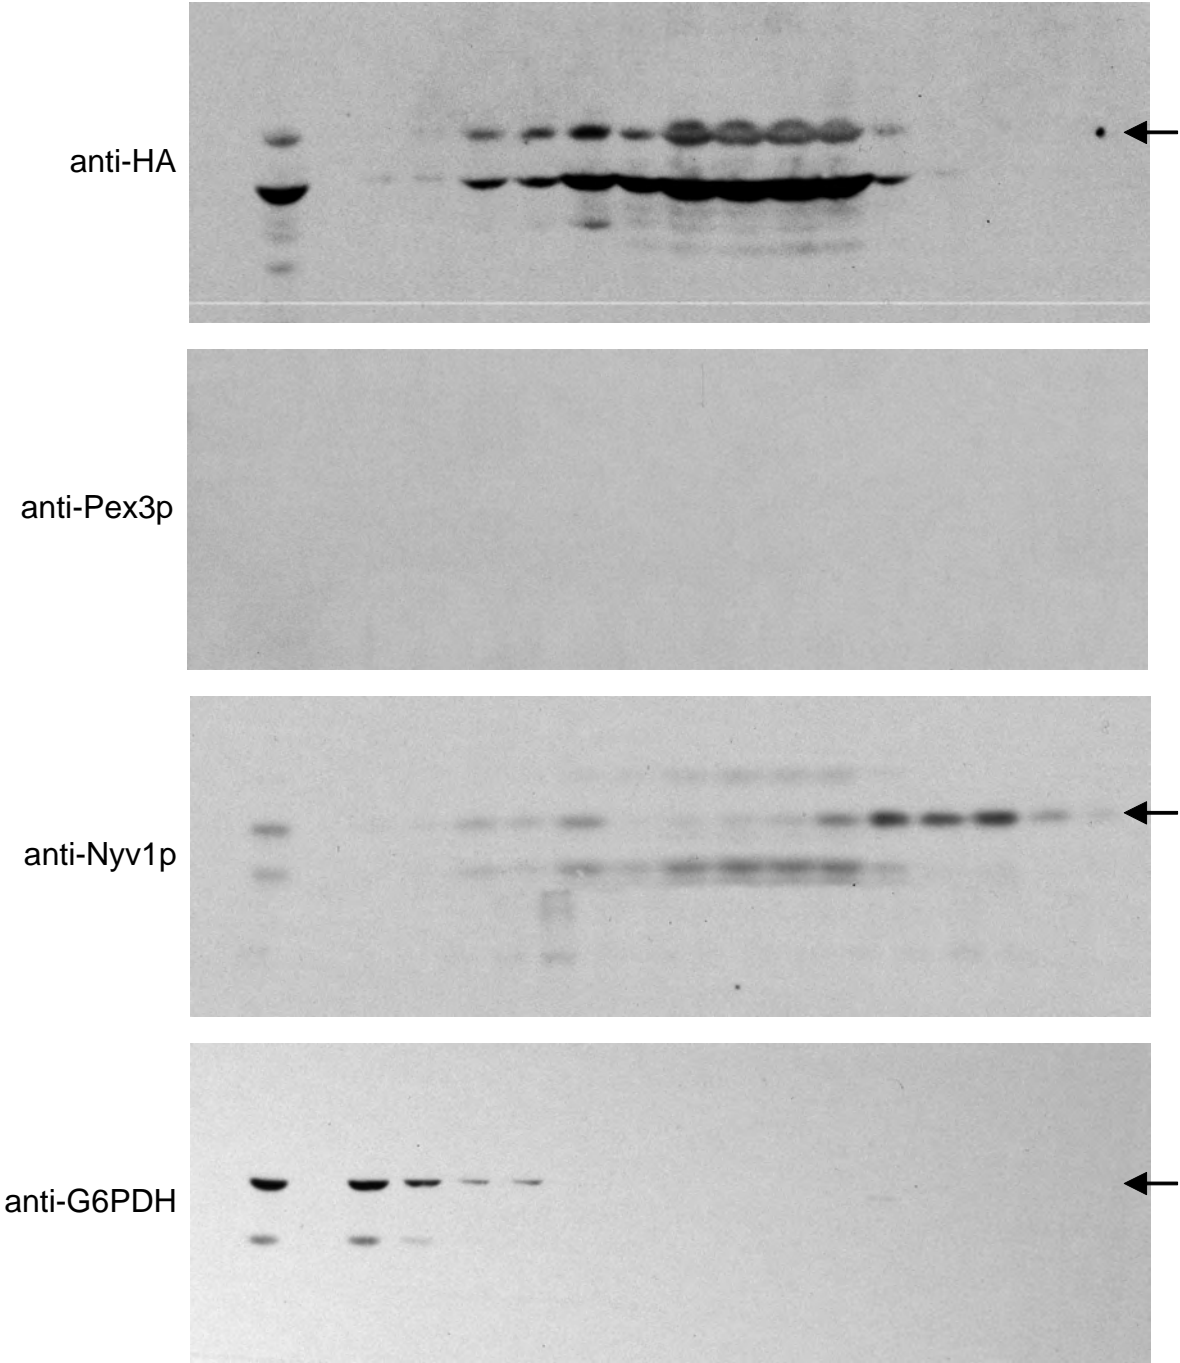

specific bands are denoted by arrow

*pex3-V81E* samples

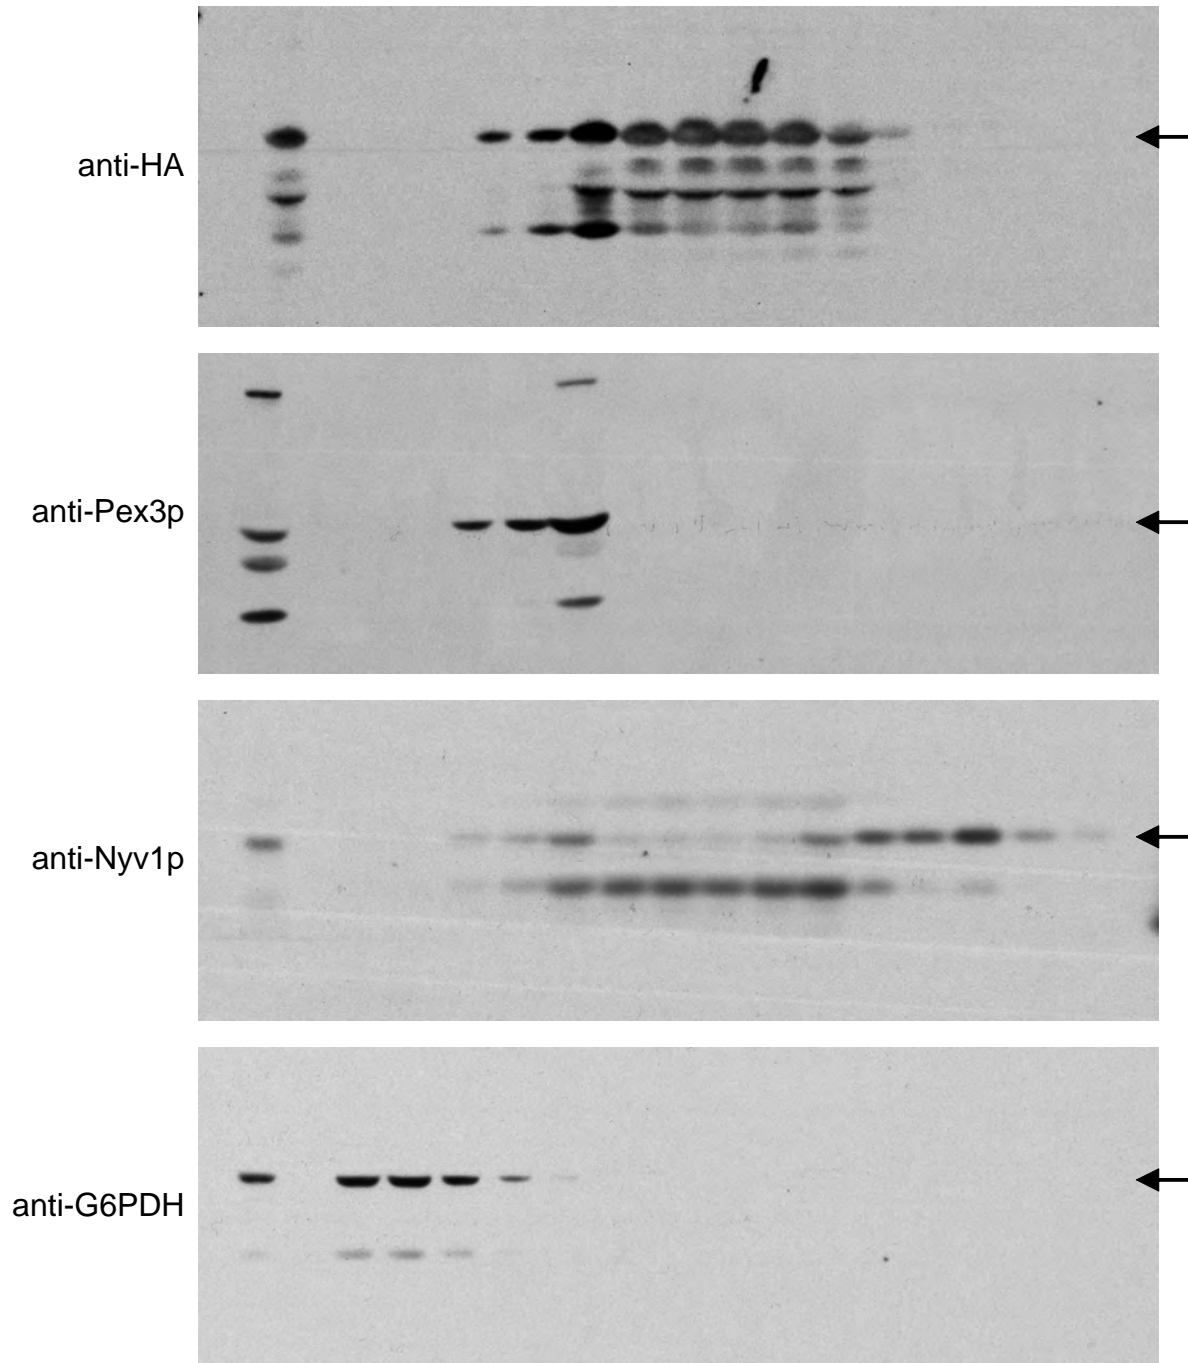

specific bands are denoted by arrow
