# Supplementary material
Source: PubMed Central journal article supplement (PMC3770948)

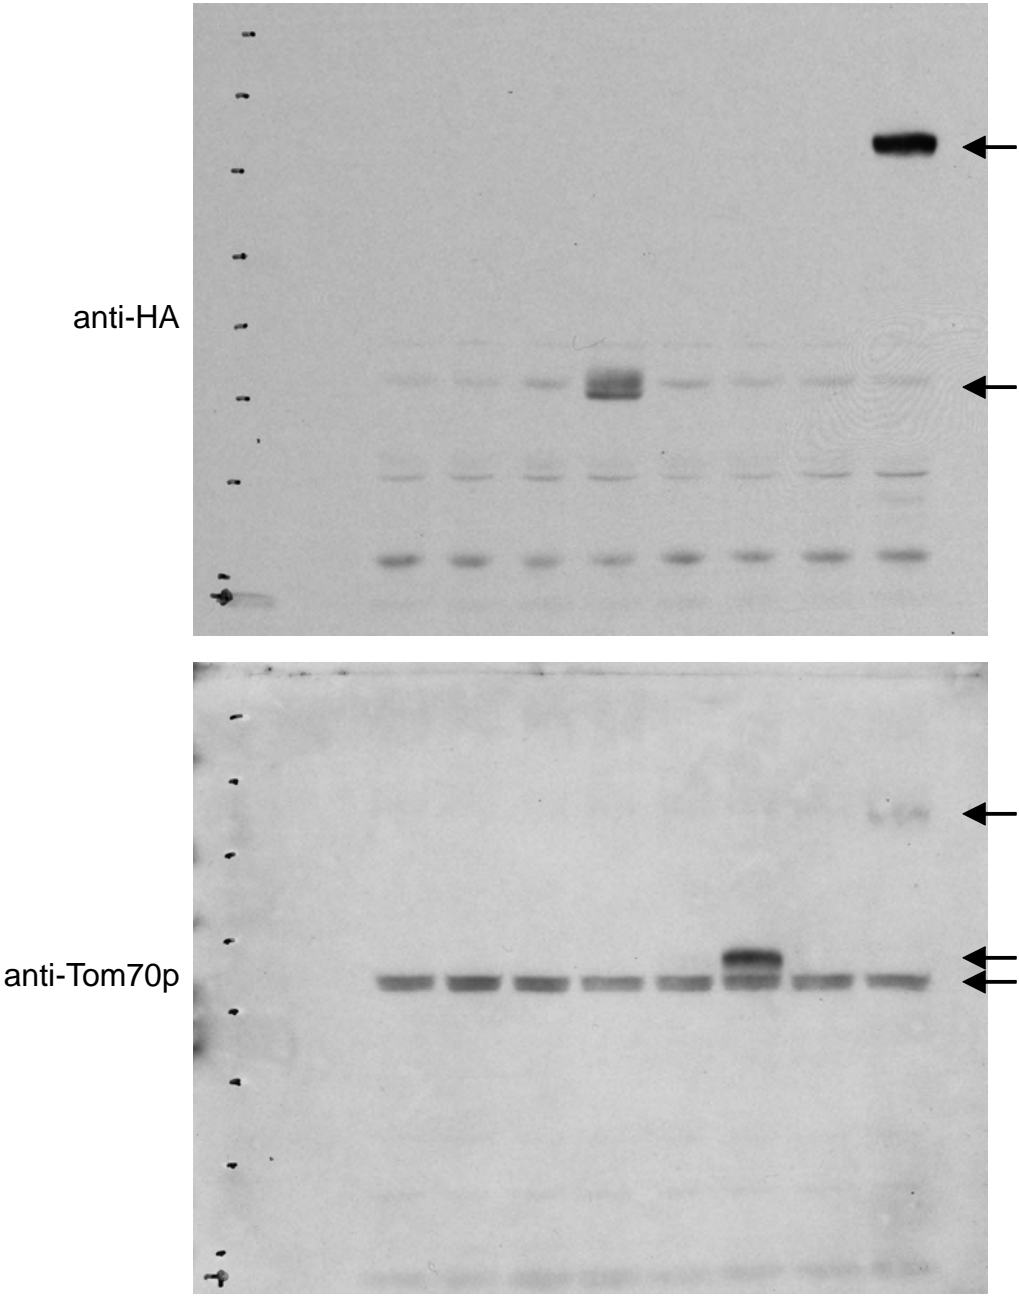

specific bands are denoted by arrow

top panel

anti-HA

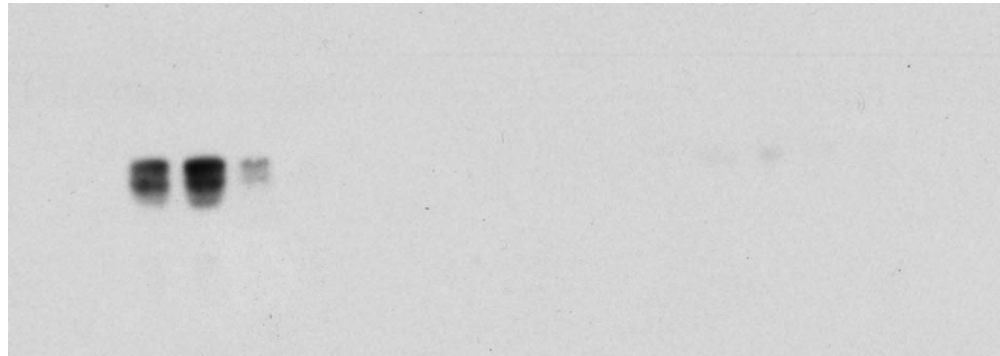

anti-thiolase

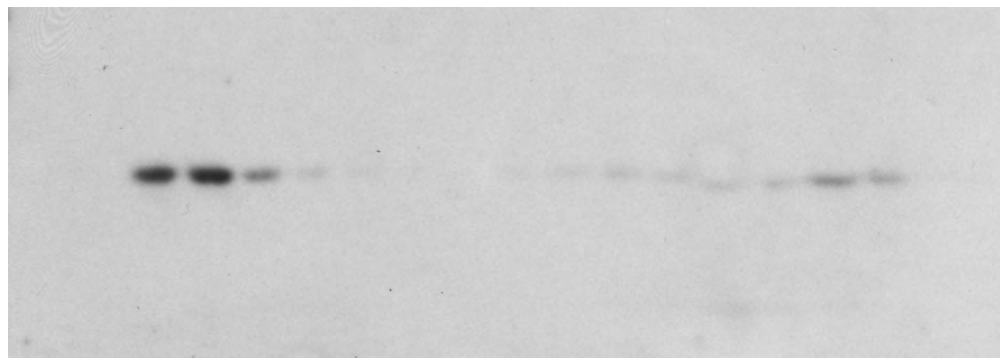

anti-Pex3p

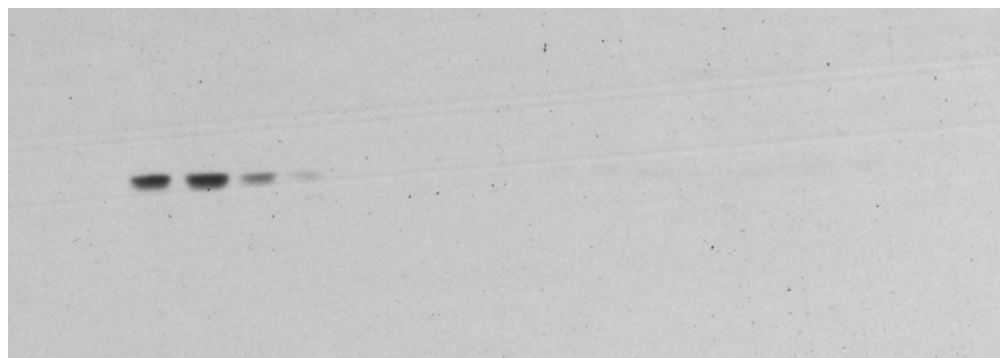

anti-Tom70p

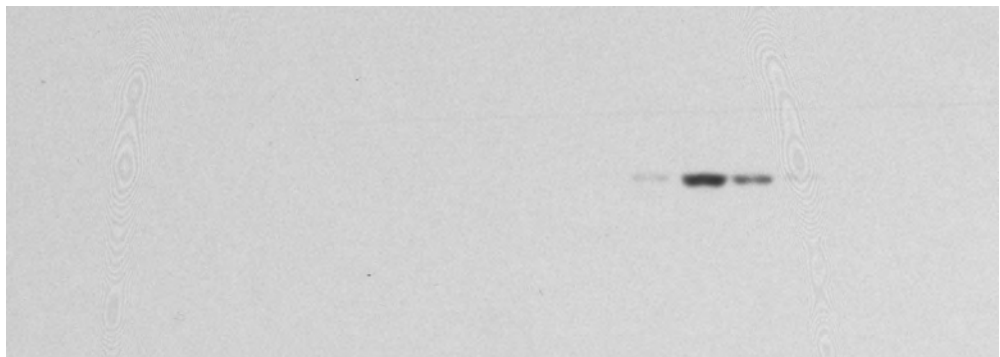

bottom panel

anti-HA

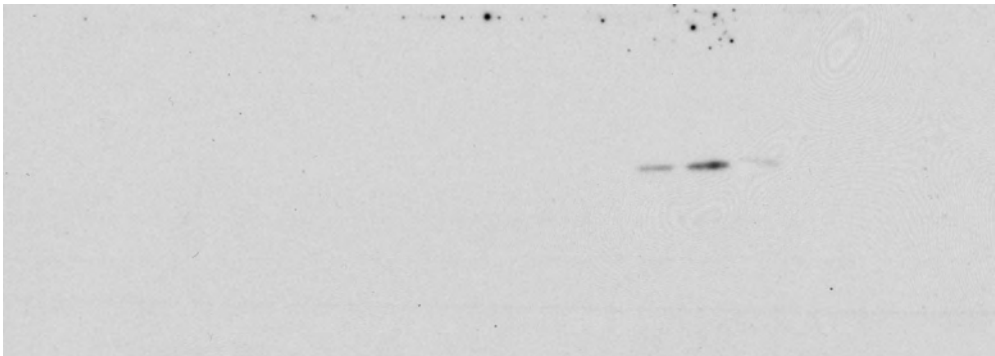

anti-thiolase

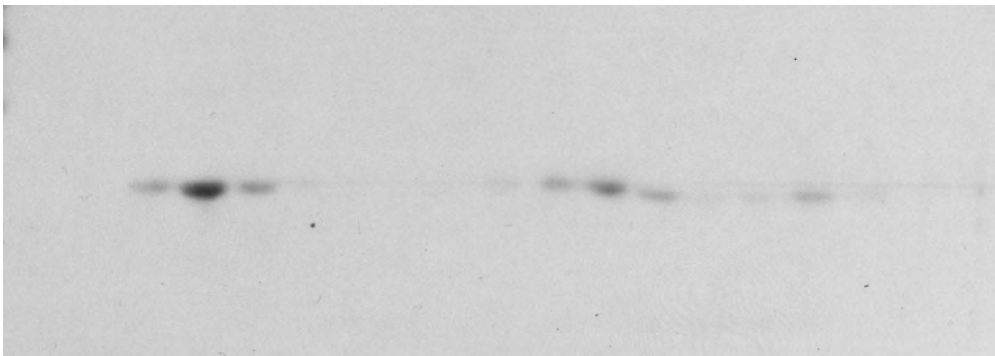

anti-Pex3p

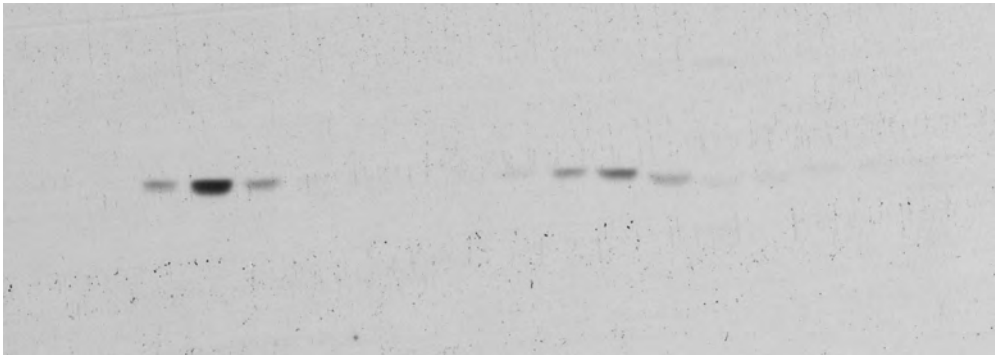

anti-Tom70p

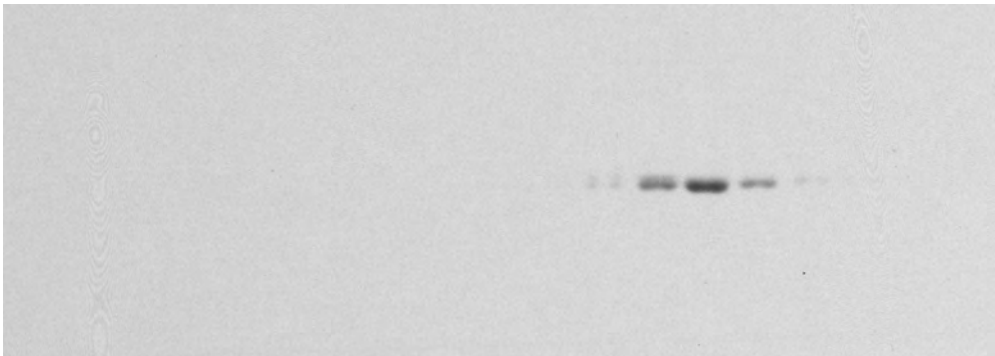

Supplement: emboj2013170df3.pdf [file emboj2013170df3.pdf]
