# Supplementary material
Source: PubMed Central journal article supplement (PMC3770948)

Pulldown assay

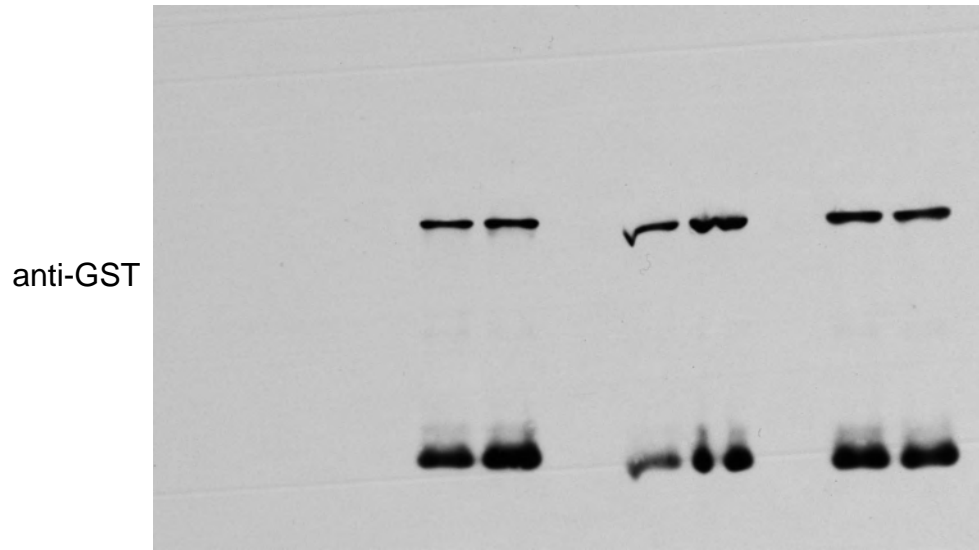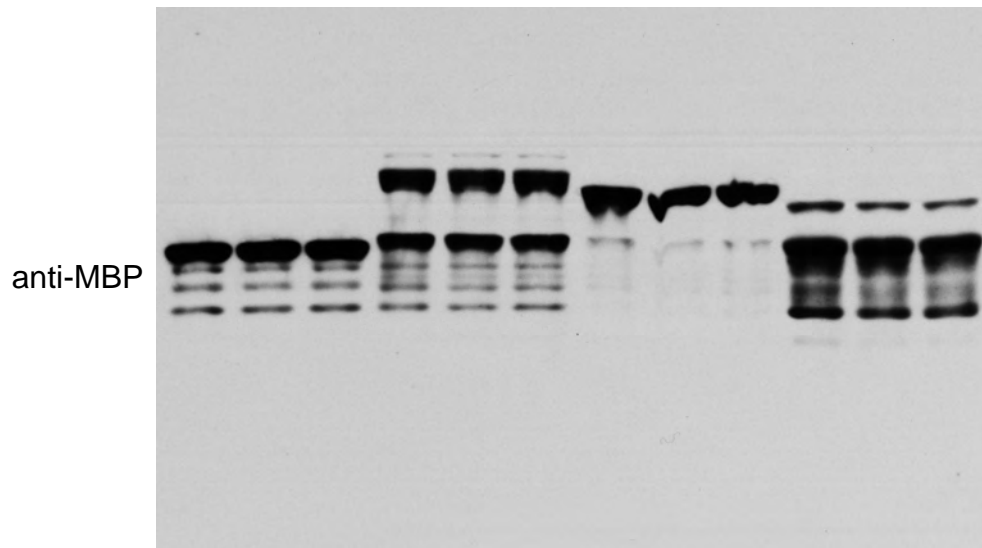

Load

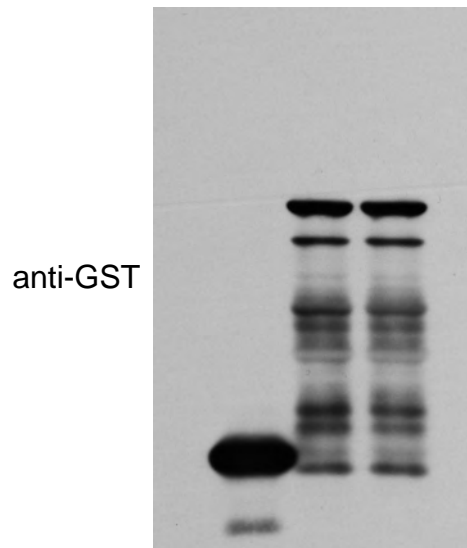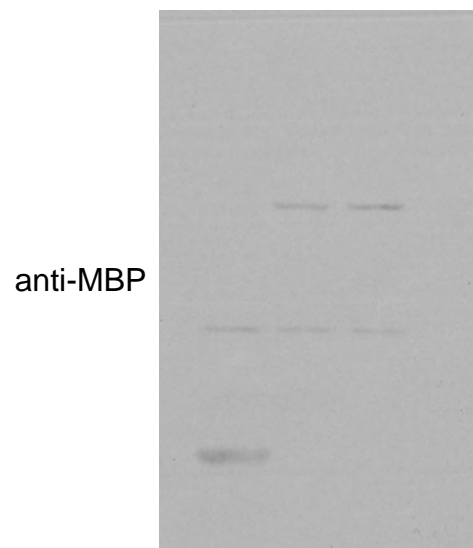

top panel

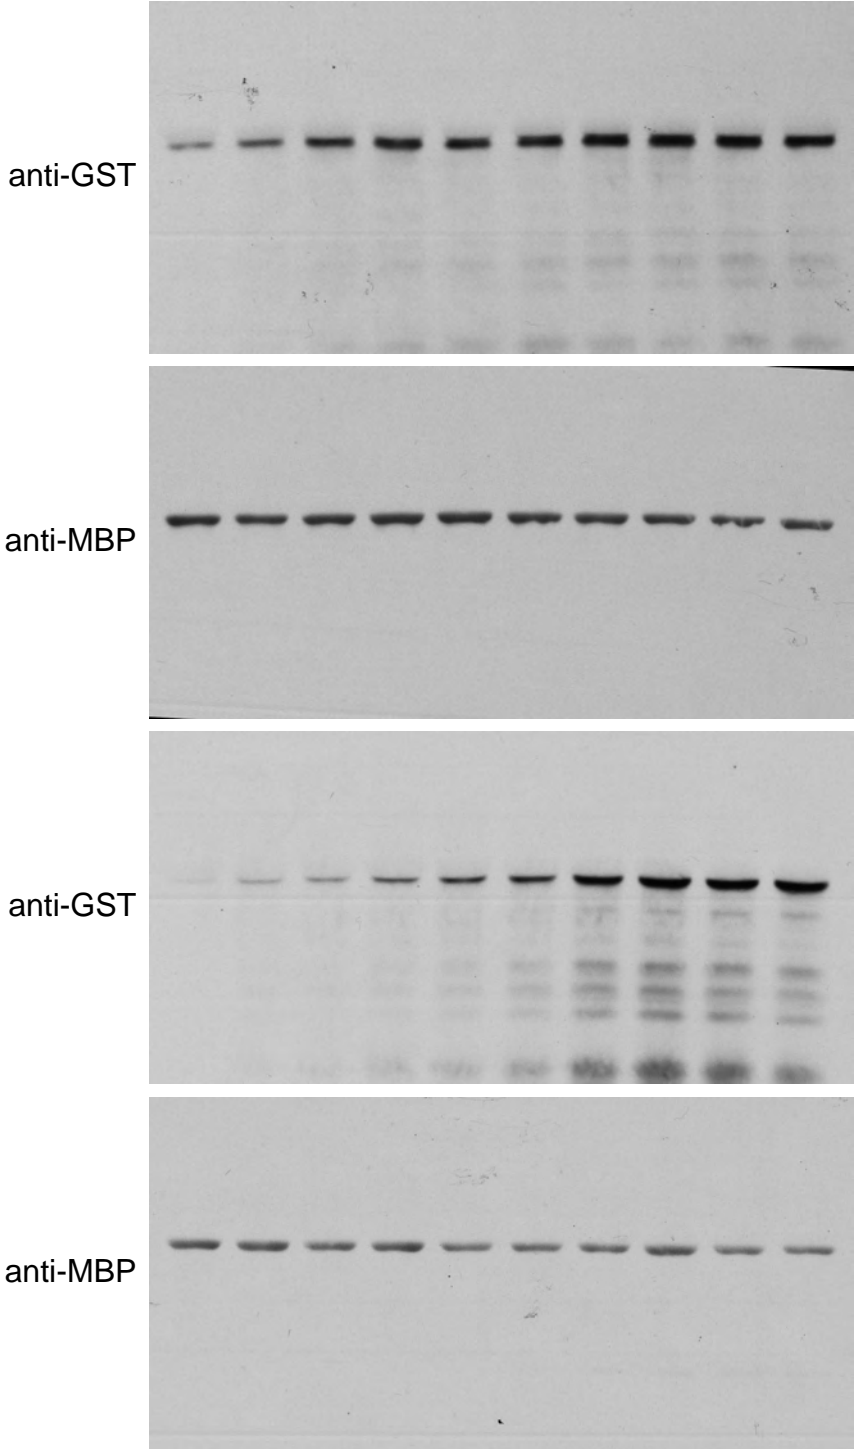

middle panel

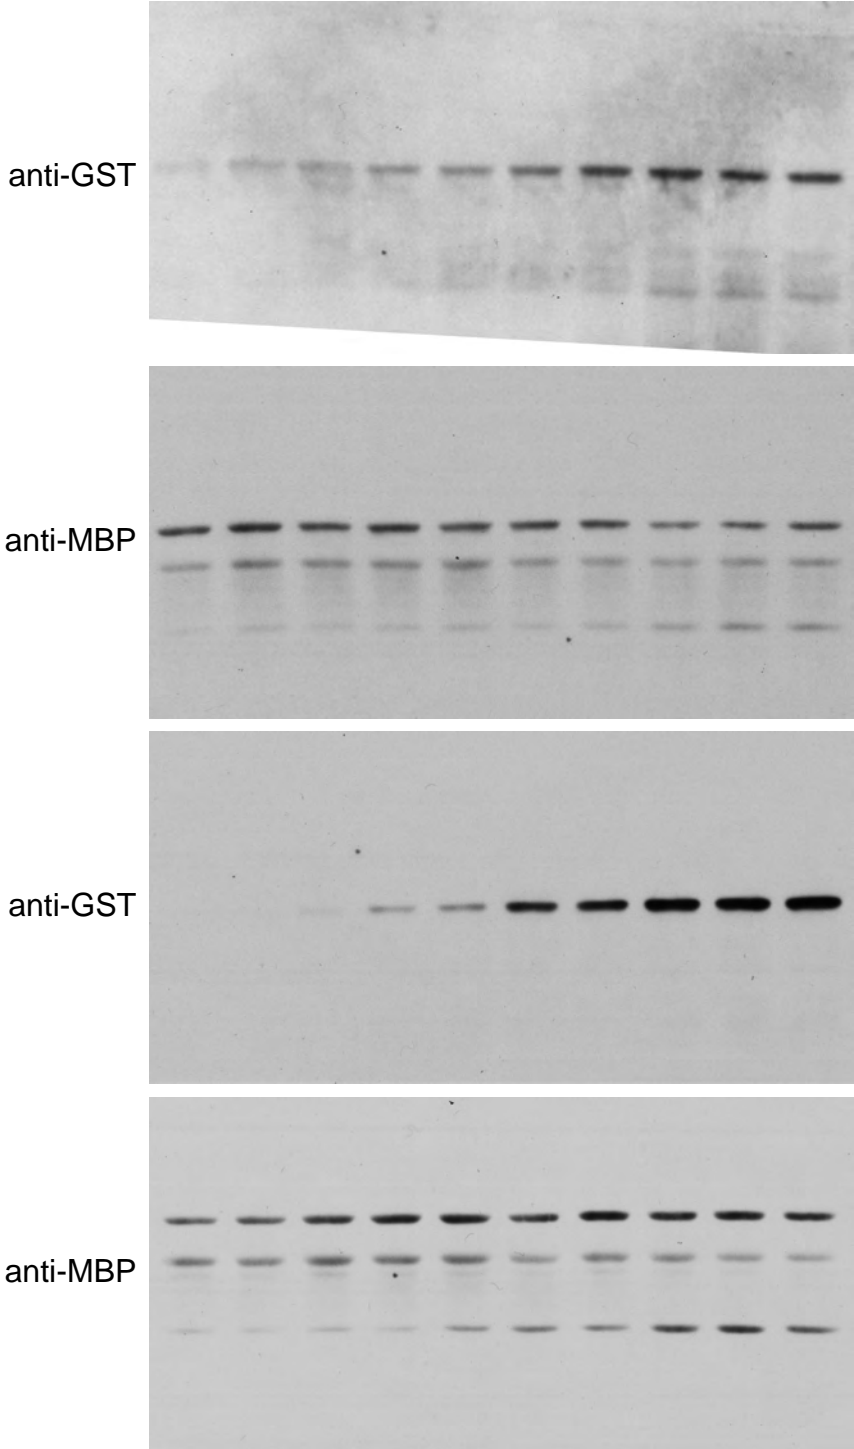

lower panel

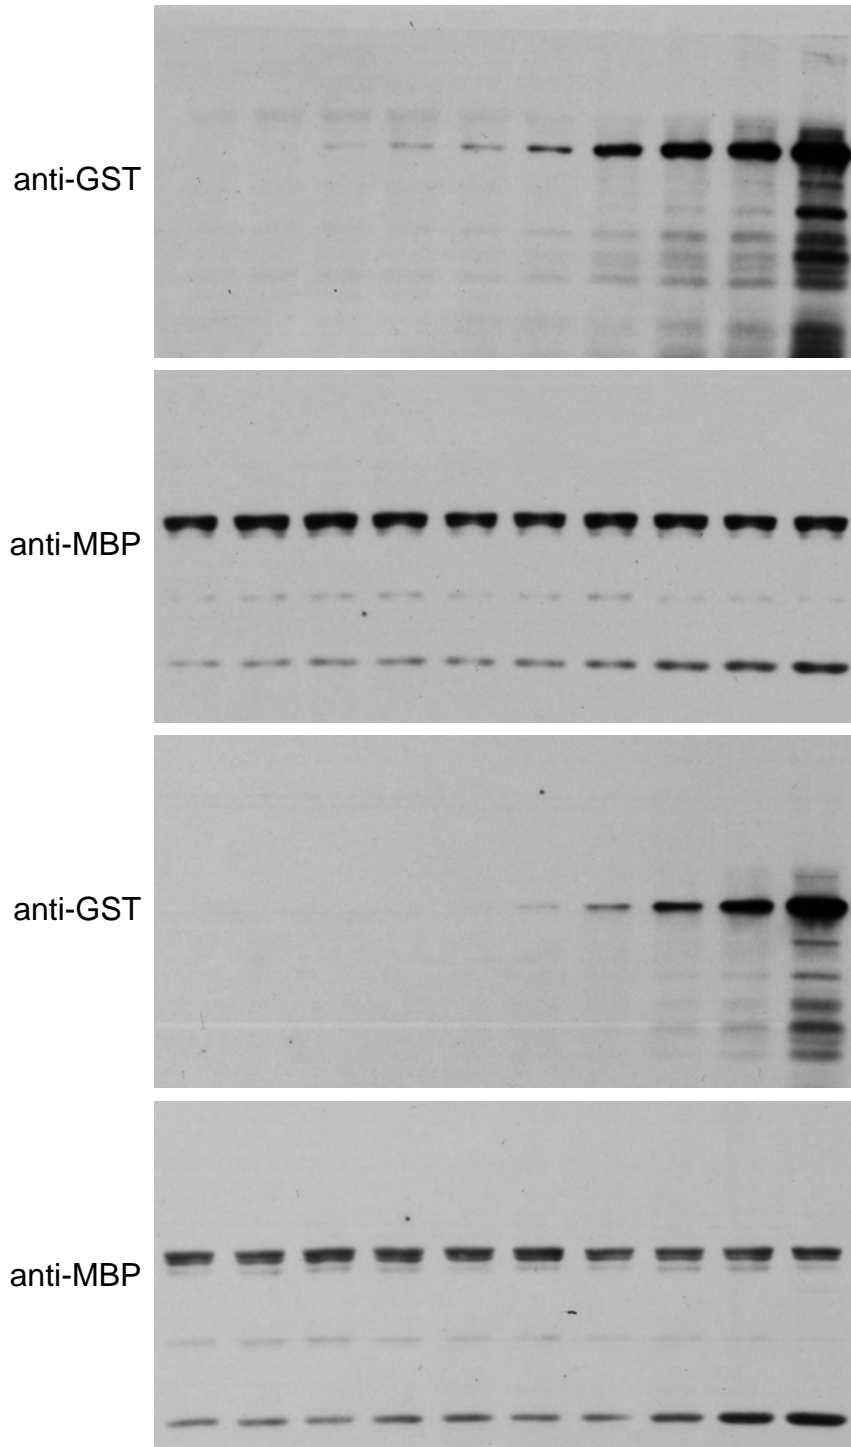

Supplement: emboj2013170df4.pdf [file emboj2013170df4.pdf]
